# Supplementary material for: Phylogenetic and Structural Analysis of NIN-Like Proteins With a Type I/II PB1 Domain That Regulates Oligomerization for Nitrate Response
Source: Front Plant Sci. 2021 May 31;12:672035. doi: 10.3389/fpls.2021.672035 (PMC8200828; doi:10.3389/fpls.2021.672035)
Supplement: Supplementary Table 1 — List of species and sequences used in phylogeny reconstruction. [file Data_Sheet_2.xlsx]

## Sheet: Supplementary Table 1
Speceies	Gene codes	Accession numbers	resource
Arabidopsis thaliana
	AtNLP1	AT2G17150	NCBI
	AtNLP2	AT4G35270
	AtNLP3	AT4G38340
	AtNLP4	AT1G20640
	AtNLP5	AT1G76350
	AtNLP6	AT1G64530
	AtNLP7	AT4G24020
	AtNLP8	AT2G43500
	AtNLP9	AT3G59580
Amborella trichopoda
		scaffold00066	Amborella trichopoda v1.0 https://phytozome.jgi.doe.gov/pz/portal.html
		scaffold00058
		scaffold00001
Aquilegia coerulea		Aqcoe3G052100	Aquilegia coerulea v3.1 https://phytozome.jgi.doe.gov/pz/portal.html
		Aqcoe6G066000
		Aqcoe6G176900
Helianthus annuus	HaNLP2	XM_022152857.2	NCBI
	HaNLP7	XM_022116912.2
	HaNLP5	XM_022115269.2
	HaNLP1	XM_022163506.2
Marchantia polymorpha
		Mapoly0083s0040	Marchantia polymorpha v3.1 https://phytozome.jgi.doe.gov/pz/portal.html
Medicago truncatula	MtNLP4	XM_003592222	NCBI
	MtNLP5	XM_003618060
	MtNLP6	XP_022136625
	MtNLP7	XP_013443315
	MtNLP9	XM_024776815
Momordica charantia	NLP6	XM_022280933	NCBI
	NLP5	XM_022282319
Micromonas pusilla CCMP1545	Mpu53007	53007	Micromonas pusilla CCMP1545 v3.0 https://phytozome.jgi.doe.gov/pz/portal.html
	Mpu39571	39571
Micromonas sp. RCC299	Msp64855	64855	Micromonas sp. RCC299 v3.0 https://phytozome.jgi.doe.gov/pz/portal.html
	Msp56348	56348
Oryza sativa	OsNLP1	XM_015756630	NCBI
	OsNLP2	XM_015781036
	OsNLP3	XM_015757534
Physcomitrella patens	PpNLP9l	Pp3c15_9180V3.1	Physcomitrella patens v3.3 https://phytozome.jgi.doe.gov/pz/portal.html
	PpNLP8l	Pp3c22_6360V3.1
	PpNLP7l	Pp3c12_2070V3.1
	PpNLP6l	Pp3c17_4370V3.1
	PpNLP3l	Pp3c9_14600V3.1
Parasponia andersonii	PaNLP2	XM_028912283	NCBI
	PaNLP5	XM_028940525
	PaNLP6	XM_028930763
	PaNLP9	XM_028924259
Pseudotsuga menziesii	PME25376	PME00025376	PLAZA Gymnosperms https://bioinformatics.psb.ugent.be/plaza/versions/gymno-plaza/
	PME9656	PME0009656
Quercus lobata	QlNLP2	XM_031086266	NCBI
	QlNLP8	XM_031082449
Selaginella moellendorffii	Sm 172537	172537	Selaginella moellendorffii v1.0 https://phytozome.jgi.doe.gov/pz/portal.html
	SmNLP5	XP_024532753	NCBI
	SmNLP6	XP_002990558	NCBI
Solanum lycopersicum	SlNLP2	XM_004231048	NCBI
	SlNLP4	XM_004238386
	SlNLP9	XM_004244695
	SlNLP7L	XM_004244592
	SlNLP9L	XM_004250728
Zea mays	ZmNLP1	XM_035966001	NCBI
	ZmNLP2	XM_008671003
	ZmNLP2-2	GRMZM2G105004
	ZmNLP3	XM_008657585
	ZmNLP8	NM_001174556
	ZmNIN1	NM_001158099

## Sheet: Supplementary Table 2
Primer List
Primer name	Sequences (5'-3')	Aim
NLP7 PB1 EcoRI primer F	ATTCCGAATTCCCAAAGGAAGAGGCCATTGC	Cloning wild type NLP7 PB1 domain into pET28a
NLP7 PB1 Eco RI primer R	AATTAAGCTTCTAGCAGGAGCTCCCTAGATTTGTCG
NLP7 PB1 K867 A primer F	GAGAACGGTAACAATCGCAGCAAGTTACAAAGACG	Site-directed mutagenesis for Type II PB1 domain
NLP7 PB1 K867 A primer R	CGTCTTTGTAACTTGCAGATGCAAACGCATGGG
NLP7 PB1 D909A/D911A primer F	CGATATCAAGTATCTTGCAGATGCAAACGCATGGG	Site-directed mutagenesis for Type I PB1 domain
NLP7 PB1 D909A/D911A primer R	CCCATGCGTTTGCATCTGCAAGATACTTGATATCG

## Sheet: Supplementary Table 3
	Supplementary table 3. Pairwise amino acid residue similarity measured among AtNLP7 PB1 and identified PB1 domain containing homologues
		AtNLP7_PB1
	Zinc-finger protein NBR1	0.4944
	Mitogen-activated protein kinase 5	0.4199
	Auxin response factor 7	0.377
	Auxin-induced protein IAA4	0.4119
	Ubiquitin	0.3663
